# Supplementary material
Source: MDPI journal article supplement (https://www.mdpi.com/2304-6740/8/9/46)
Supplement: s1 [file s1]

# Supporting Information: Synthesis and Thermochromic Luminescence of Ag(I) Complexes Based on 4,6-Bis(diphenylphosphino)pyrimidine

Alexander V. Artem'ev,\* Maria P. Davydova, Alexey S. Berezin and Denis G. Samsonenko

Nikolaev Institute of Inorganic Chemistry, Siberian Branch of Russian Academy of Sciences, 3, Acad. Lavrentiev Ave., Novosibirsk 630090, Russian Federation

\*Correspondence: [chemisufarm@yandex.ru](mailto:chemisufarm@yandex.ru)

## Table of content

|    |                                                                                                                                                                                                                 |
|----|-----------------------------------------------------------------------------------------------------------------------------------------------------------------------------------------------------------------|
| S2 | <b>Table S1.</b> X-Ray crystallographic data for <b>1</b> ·CH <sub>3</sub> CN and <b>2</b> ·CH <sub>3</sub> CN.                                                                                                 |
| S3 | <b>Figure S1.</b> FT-IR spectra of <b>1</b> and <b>2</b> displayed in the fingerprint range.                                                                                                                    |
| S3 | <b>Figure S2.</b> Solid state absorption spectra of <b>1</b> and <b>2</b> plotted as a Kubelka-Munk function.                                                                                                   |
| S4 | <b>Figure S3.</b> Temperature dependence of the integral intensity of the emission of <b>1</b> ( $\lambda_{\text{ex}} = 365$ nm).                                                                               |
| S4 | <b>Figure S4.</b> Temperature dependences of the integral intensity of the emission of <b>2</b> recorded at $\lambda_{\text{ex}} = 410$ nm ( <i>left</i> ) and $\lambda_{\text{ex}} = 365$ nm ( <i>right</i> ). |
| S5 | <b>Figure S5.</b> Emission decay profiles of <b>1</b> recorded at different temperatures ( $\lambda_{\text{ex}} = 385$ nm, $\lambda_{\text{em}} = 550$ nm).                                                     |
| S5 | <b>Figure S6.</b> Emission decay profiles of <b>2</b> recorded at different temperatures ( $\lambda_{\text{ex}} = 410$ nm, $\lambda_{\text{em}} = 580$ nm).                                                     |
| S6 | <b>Figure S7.</b> <sup>1</sup> H NMR spectrum of the ligand <b>L</b> (CDCl <sub>3</sub> ).                                                                                                                      |
| S6 | <b>Figure S8.</b> J-modulated <sup>13</sup> C NMR spectrum of the ligand <b>L</b> (CDCl <sub>3</sub> ).                                                                                                         |
| S7 | <b>Figure S9.</b> <sup>31</sup> P{ <sup>1</sup> H} NMR spectrum of the ligand <b>L</b> (CDCl <sub>3</sub> ).                                                                                                    |
| S8 | <b>Figure S10.</b> Four lowest unoccupied and 4 highest occupied MOs (iso-value = 0.045) for the S <sub>0</sub> state of the complex <b>1</b> calculated at the B3LYP/def2TZVP level.                           |

**Table 1.** X-Ray crystallographic data for **1·CH<sub>3</sub>CN** and **2·CH<sub>3</sub>CN**.

|                                                                                                                 | <b>1·CH<sub>3</sub>CN</b>                                                                    | <b>2·CH<sub>3</sub>CN</b>                                                                                   |
|-----------------------------------------------------------------------------------------------------------------|----------------------------------------------------------------------------------------------|-------------------------------------------------------------------------------------------------------------|
| Crystal data                                                                                                    | 2020455                                                                                      | 2020456                                                                                                     |
| Chemical formula                                                                                                | C <sub>62</sub> H <sub>53</sub> Ag <sub>2</sub> N <sub>9</sub> O <sub>6</sub> P <sub>4</sub> | C <sub>36</sub> H <sub>34</sub> Ag <sub>2</sub> B <sub>2</sub> F <sub>8</sub> N <sub>6</sub> P <sub>2</sub> |
| <i>M<sub>r</sub></i>                                                                                            | 1359.75                                                                                      | 1001.99                                                                                                     |
| Crystal system, space group                                                                                     | Monoclinic, <i>P</i> 2 <sub>1</sub> / <i>n</i>                                               | Orthorhombic, <i>P</i> 2 <sub>1</sub> 2 <sub>1</sub> 2 <sub>1</sub>                                         |
| Temperature (K)                                                                                                 | 140                                                                                          | 140                                                                                                         |
| <i>a</i> , <i>b</i> , <i>c</i> (Å)                                                                              | 9.2947(2), 18.598(5), 18.314(4)                                                              | 13.2478(4), 15.6986(4), 19.7010(5)                                                                          |
| β(°)                                                                                                            | 90.534(2)                                                                                    | –                                                                                                           |
| <i>V</i> (Å <sup>3</sup> )                                                                                      | 3165.78(13)                                                                                  | 4097.25(19)                                                                                                 |
| <i>Z</i>                                                                                                        | 2                                                                                            | 4                                                                                                           |
| μ (mm <sup>−1</sup> )                                                                                           | 0.78                                                                                         | 1.11                                                                                                        |
| Crystal size (mm)                                                                                               | 0.21 × 0.12 × 0.09                                                                           | 0.39 × 0.24 × 0.11                                                                                          |
| <i>T</i> <sub>min</sub> , <i>T</i> <sub>max</sub>                                                               | 0.993, 1.000                                                                                 | 0.922, 1.000                                                                                                |
| No. of measured, independent and observed [ <i>I</i> > 2 (σ( <i>I</i> ))] reflections                           | 14090, 6793, 5449                                                                            | 21537, 9167, 8486                                                                                           |
| <i>R</i> <sub>int</sub>                                                                                         | 0.018                                                                                        | 0.023                                                                                                       |
| (sin θ / λ) <sub>max</sub> (Å <sup>−1</sup> )                                                                   | 0.675                                                                                        | 0.682                                                                                                       |
| <i>R</i> [ <i>F</i> <sup>2</sup> > 2 σ( <i>F</i> <sup>2</sup> )], <i>wR</i> ( <i>F</i> <sup>2</sup> ), <i>S</i> | 0.063, 0.180, 1.06                                                                           | 0.026, 0.056, 1.02                                                                                          |
| No. of reflections                                                                                              | 6793                                                                                         | 9167                                                                                                        |
| No. of parameters                                                                                               | 565                                                                                          | 555                                                                                                         |
| No. of restraints                                                                                               | 937                                                                                          | 200                                                                                                         |
| <i>Δ</i> <sub>max</sub> <i>Δ</i> <sub>min</sub> (e Å <sup>−3</sup> )                                            | 1.78, −2.30                                                                                  | 0.46, −0.38                                                                                                 |

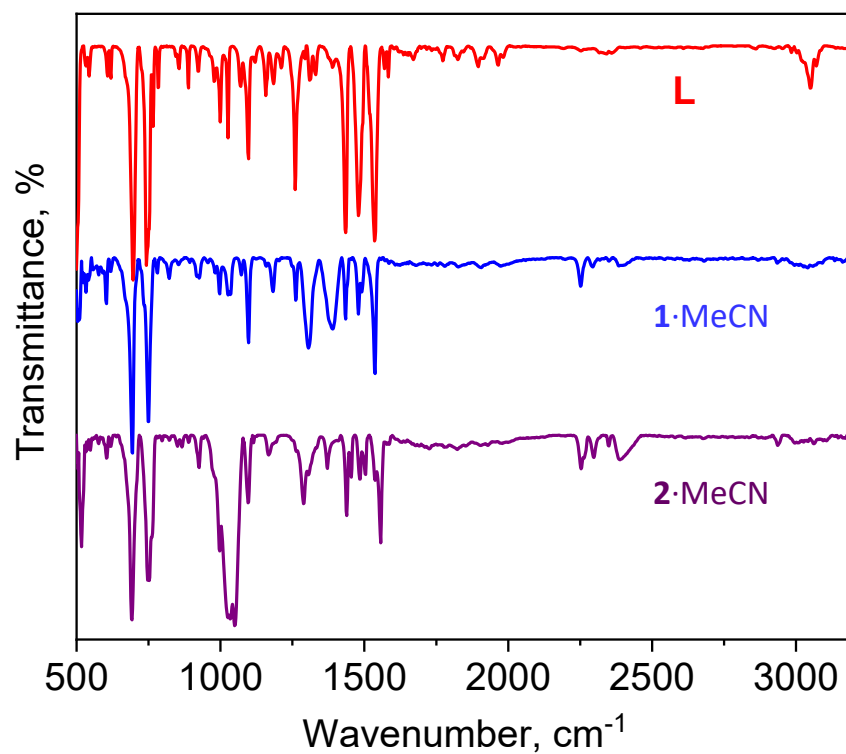

Figure S1. FT-IR spectra of **1**, **2** and parent ligand **L**.

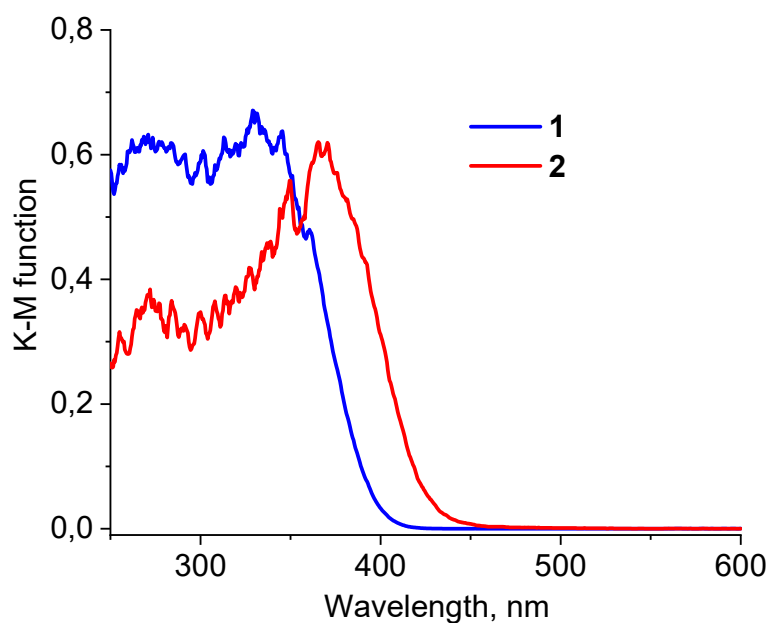

Figure S2. Solid state absorption spectra of **1** and **2** plotted as a Kubelka-Munk function.

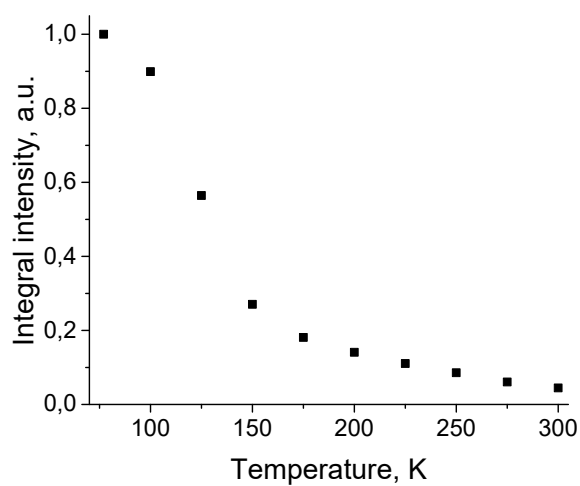

**Figure S3.** Temperature dependence of the integral intensity of the emission of **1** ( $\lambda_{\text{ex}} = 365$  nm).

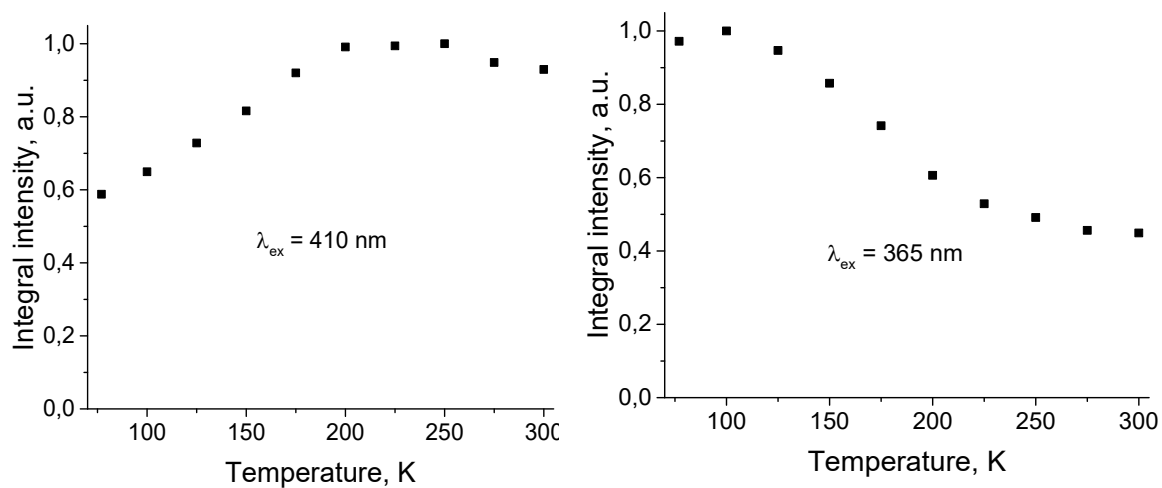

**Figure S4.** Temperature dependences of the integral intensity of the emission of **2** recorded at  $\lambda_{\text{ex}} = 410$  nm (*left*) and  $\lambda_{\text{ex}} = 365$  nm (*right*).

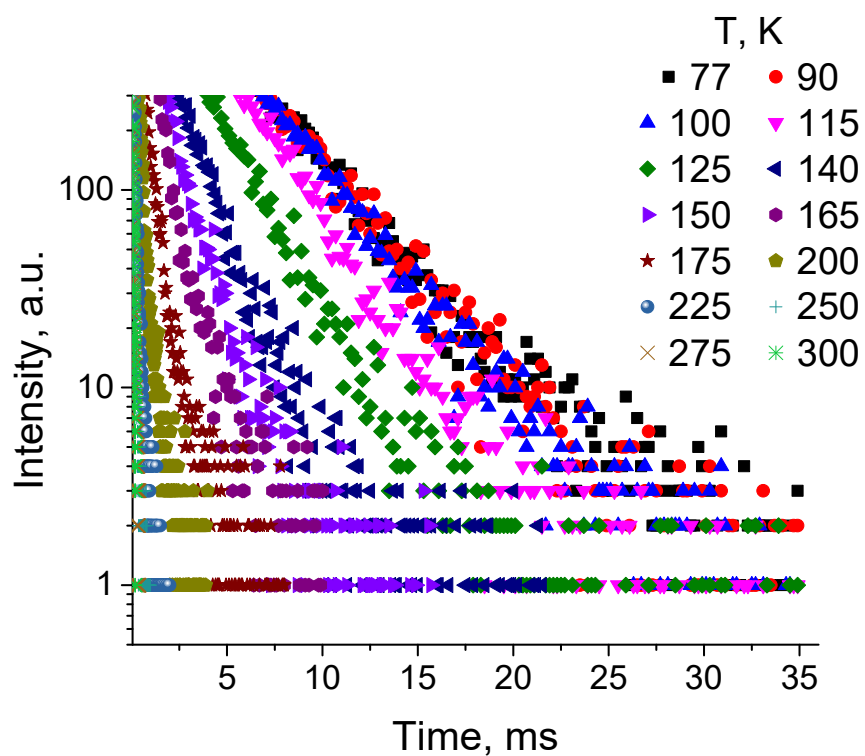

**Figure S5.** Emission decay profiles of **1** recorded at different temperatures ( $\lambda_{\text{ex}} = 385$  nm,  $\lambda_{\text{em}} = 550$  nm).

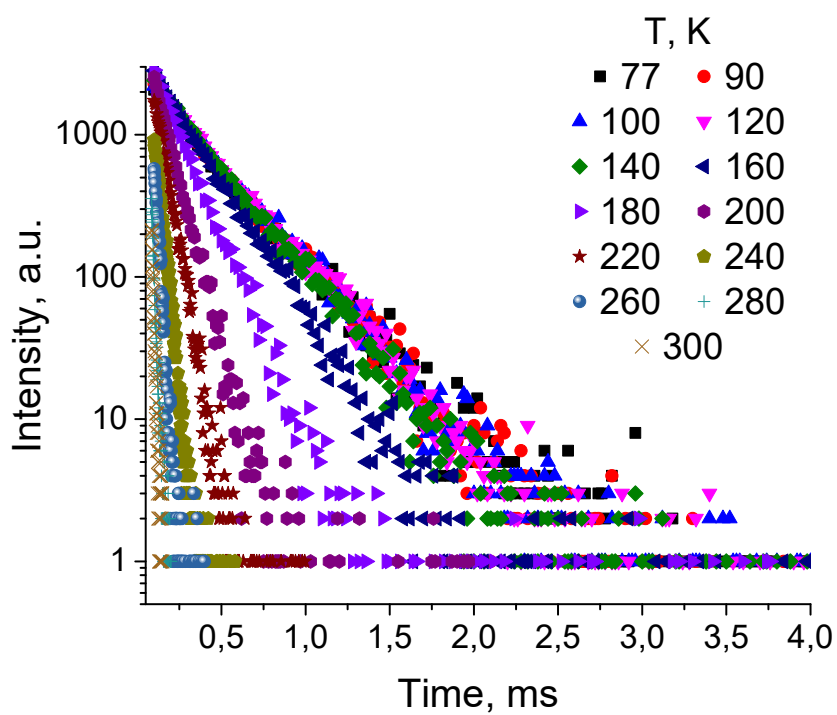

**Figure S6.** Emission decay profiles of **2** recorded at different temperatures ( $\lambda_{\text{ex}} = 410$  nm,  $\lambda_{\text{em}} = 580$  nm).

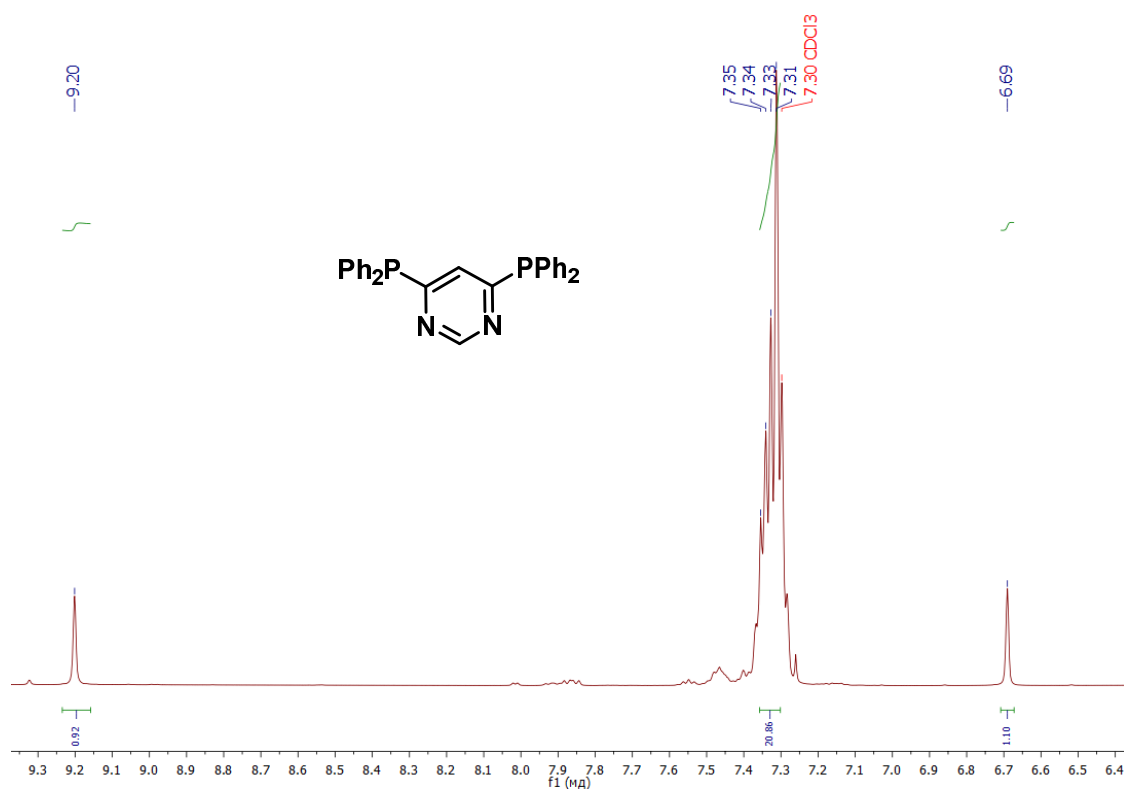

Figure S7.  $^1\text{H}$  NMR spectrum of the ligand L ( $\text{CDCl}_3$ ).

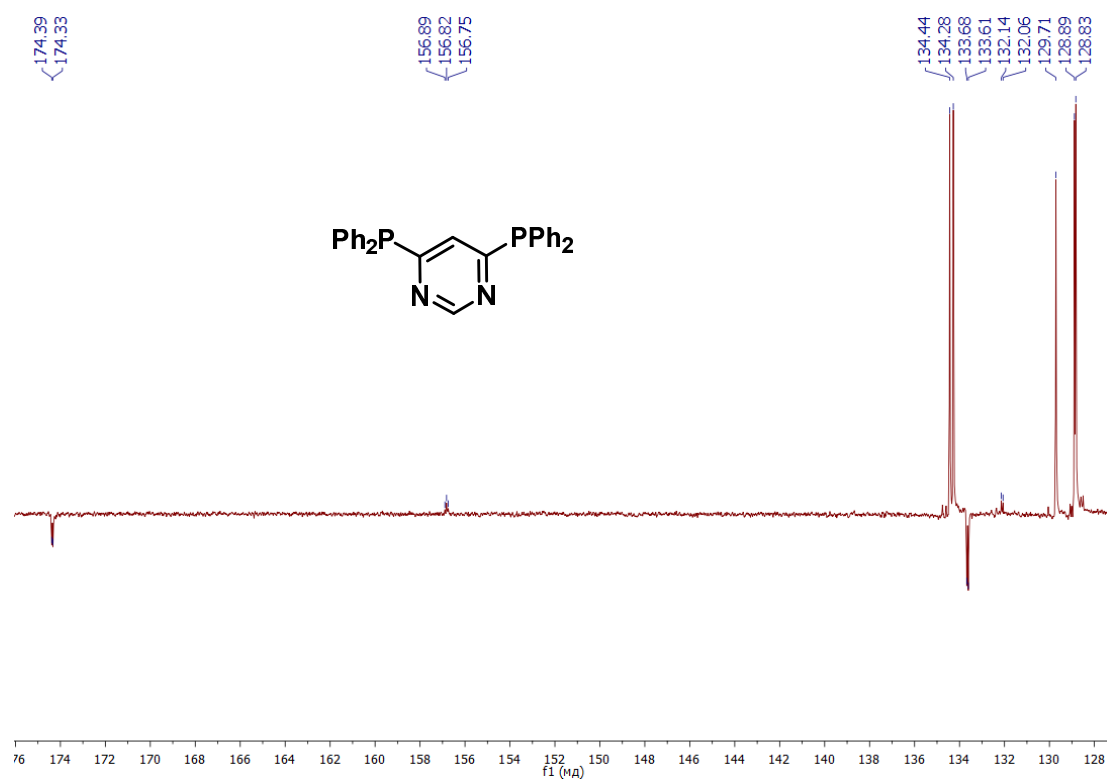

Figure S8. J-modulated  $^{13}\text{C}$  NMR spectrum of the ligand L ( $\text{CDCl}_3$ ).

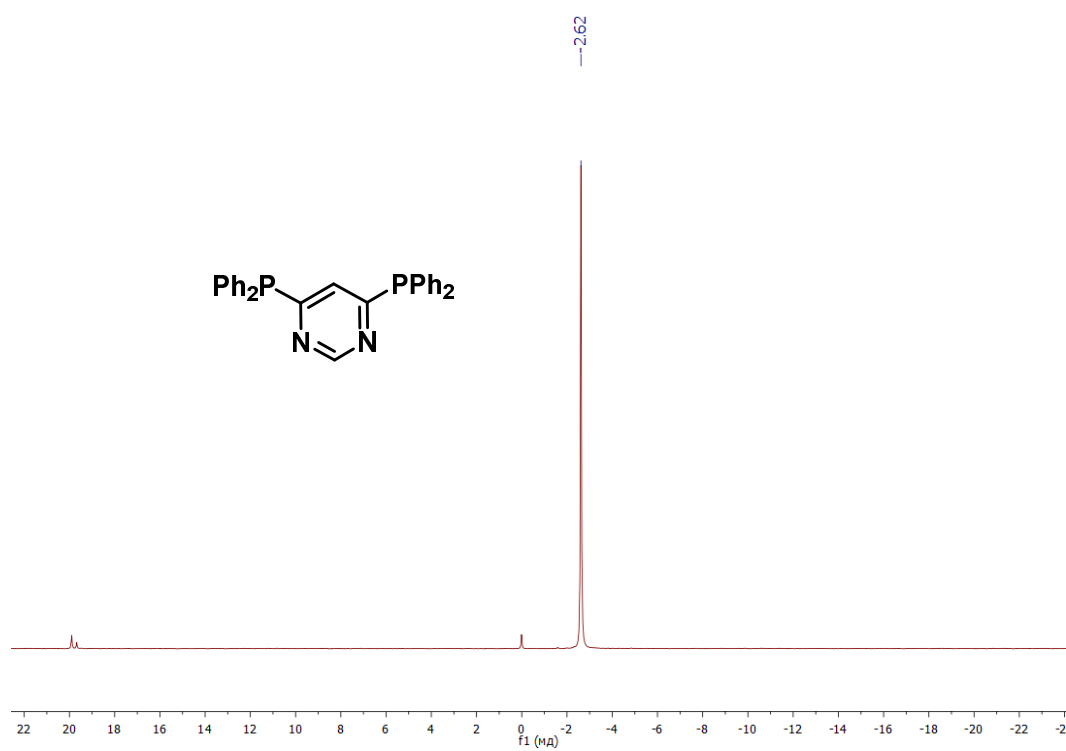

**Figure S9.**  $^{31}\text{P}\{^1\text{H}\}$  NMR spectrum of the ligand L ( $\text{CDCl}_3$ ).

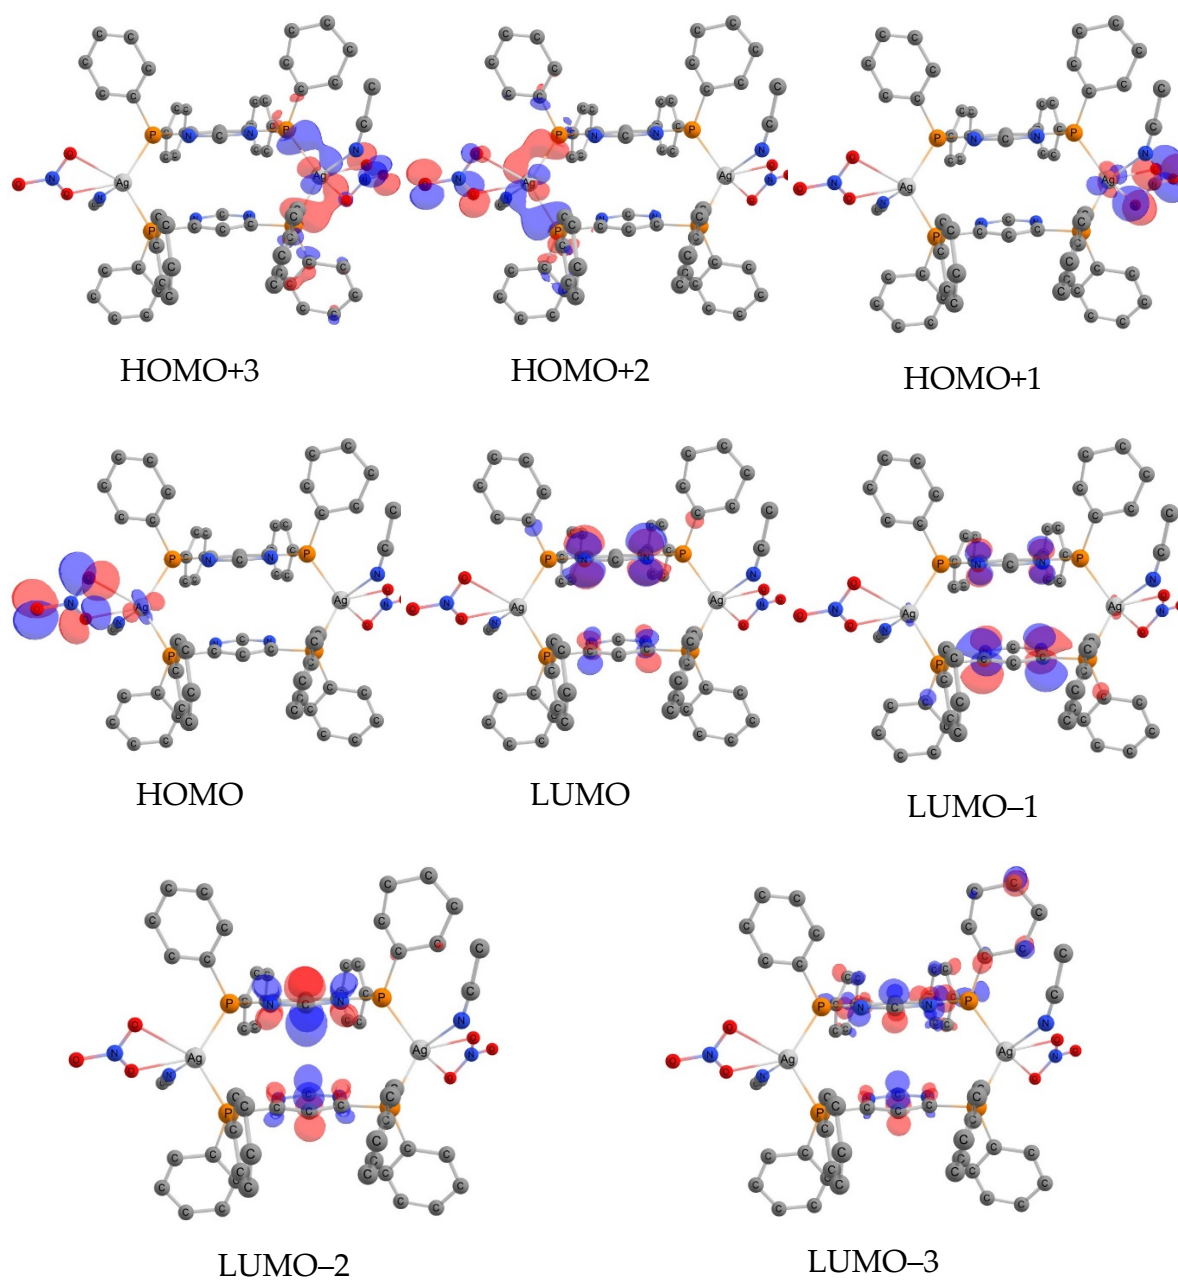

**Figure 10.** Four lowest unoccupied and 4 highest occupied MOs (iso-value = 0.045) for the  $S_0$  state of the complex **1** calculated at the B3LYP/def2TZVP level. .
