# Supplementary material
Source: MDPI journal article supplement (https://www.mdpi.com/2304-6740/8/9/46)
Supplement: s1 [file s1]

# checkCIF () running

Checking for embedded fcf data in CIF ...

Found embedded fcf data in CIF. Extracting fcf data from uploaded CIF, please wait . . .

## checkCIF/PLATON (full publication check)

You have not supplied any structure factors. As a result the full set of tests cannot be run.

THIS REPORT IS FOR GUIDANCE ONLY. IF USED AS PART OF A REVIEW PROCEDURE FOR PUBLICATION, IT SHOULD NOT REPLACE THE EXPERTISE OF AN EXPERIENCED CRYSTALLOGRAPHIC REFEREE. You have not supplied any structure factors. As a result the full set of tests cannot be run.

No syntax errors found.

[CIF dictionary](#)  
[Interpreting this report](#)

[Structure factor report](#)

### Datablock: I

|                    |                                                 |                                 |
|--------------------|-------------------------------------------------|---------------------------------|
| Bond precision:    | C-C = 0.0090 Å                                  | Wavelength=0.71073              |
| Cell:              | a=9.2947(2)      b=18.5982(5)      c=18.3144(4) |                                 |
|                    | alpha=90      beta=90.534(2)      gamma=90      |                                 |
| Temperature:       | 140 K                                           |                                 |
|                    | Calculated                                      | Reported                        |
| Volume             | 3165.78(13)                                     | 3165.78(13)                     |
| Space group        | P 21/n                                          | P 21/n                          |
| Hall group         | -P 2yn                                          | -P 2yn                          |
| Moiety             | C60 H50 Ag2 N8 O6                               | ?                               |
| formula            | P4, C2 H3 N                                     |                                 |
| Sum formula        | C62 H53 Ag2 N9 O6 P4                            | C62 H53 Ag2 N9 O6 P4            |
| Mr                 | 1359.76                                         | 1359.75                         |
| Dx, g cm-3         | 1.426                                           | 1.426                           |
| Z                  | 2                                               | 2                               |
| Mu (mm-1)          | 0.776                                           | 0.776                           |
| F000               | 1380.0                                          | 1380.0                          |
| F000'              | 1377.67                                         |                                 |
| h, k, lmax         | 12, 25, 24                                      | 12, 24, 24                      |
| Nref               | 8176                                            | 6793                            |
| Tmin, Tmax         | 0.894, 0.933                                    | 0.993, 1.000                    |
| Tmin'              | 0.850                                           |                                 |
| Correction method= | # Reported T Limits: Tmin=0.993 Tmax=1.000      | AbsCorr = MULTI-SCAN            |
| Data completeness= | 0.831                                           | Theta(max)= 28.679              |
| R(reflections)=    | 0.0634( 5449)                                   | wR2(reflections)= 0.1797( 6793) |
| S =                | 1.064                                           | Npar= 565                       |

The following ALERTS were generated. Each ALERT has the format

**test-name\_ALERT\_alert-type\_alert-level.**

Click on the hyperlinks for more details of the test.

#### Alert level B

[PLAT995\\_ALERT\\_1\\_B](#) Can not Recreate .fcf from Embedded .res & .hkl ! Check

#### Alert level C

|                   |                                               |              |
|-------------------|-----------------------------------------------|--------------|
| PLAT048_ALERT_1_C | MoietyFormula Not Given (or Incomplete) ..... | Please Check |
| PLAT220_ALERT_2_C | NonSolvent Resd 1 C Ueq(max)/Ueq(min) Range   | 3.6 Ratio    |
| PLAT222_ALERT_3_C | NonSolvent Resd 1 H Uiso(max)/Uiso(min) Range | 4.4 Ratio    |
| PLAT242_ALERT_2_C | Low 'MainMol' Ueq as Compared to Neighbors of | Ag1 Check    |
| PLAT342_ALERT_3_C | Low Bond Precision on C-C Bonds .....         | 0.009 Ang.   |

#### Alert level G

|                   |                                                  |            |
|-------------------|--------------------------------------------------|------------|
| PLAT002_ALERT_2_G | Number of Distance or Angle Restraints on AtSite | 43 Note    |
| PLAT003_ALERT_2_G | Number of Uiso or Uij Restrained non-H Atoms ... | 53 Report  |
| PLAT083_ALERT_2_G | SHELXL Second Parameter in WGHT Unusually Large  | 9.39 Why ? |
| PLAT176_ALERT_4_G | The CIF-Embedded .res File Contains SADI Records | 9 Report   |
| PLAT178_ALERT_4_G | The CIF-Embedded .res File Contains SIMU Records | 7 Report   |
| PLAT232_ALERT_2_G | Hirshfeld Test Diff (M-X) Ag1 --P1 .             | 11.2 s.u.  |
| PLAT232_ALERT_2_G | Hirshfeld Test Diff (M-X) Ag1 --P2_a .           | 11.7 s.u.  |
| PLAT300_ALERT_4_G | Atom Site Occupancy of N2A Constrained at        | 0.5 Check  |

#### And 5 other PLAT300 Alerts

|                   |                                                  |           |
|-------------------|--------------------------------------------------|-----------|
| PLAT300_ALERT_4_G | Atom Site Occupancy of C21A Constrained at       | 0.5 Check |
| PLAT300_ALERT_4_G | Atom Site Occupancy of C22A Constrained at       | 0.5 Check |
| PLAT300_ALERT_4_G | Atom Site Occupancy of H22A Constrained at       | 0.5 Check |
| PLAT300_ALERT_4_G | Atom Site Occupancy of H22B Constrained at       | 0.5 Check |
| PLAT300_ALERT_4_G | Atom Site Occupancy of H22C Constrained at       | 0.5 Check |
| PLAT301_ALERT_3_G | Main Residue Disorder .....(Resd 1 )             | 48% Note  |
| PLAT302_ALERT_4_G | Anion/Solvent/Minor-Residue Disorder (Resd 2 )   | 100% Note |
| PLAT720_ALERT_4_G | Number of Unusual/Non-Standard Labels .....      | 13 Note   |
| PLAT760_ALERT_1_G | CIF Contains no Torsion Angles .....             | ? Info    |
| PLAT811_ALERT_5_G | No ADDSYM Analysis: Too Many Excluded Atoms .... | ! Info    |
| PLAT860_ALERT_3_G | Number of Least-Squares Restraints .....         | 937 Note  |
| PLAT933_ALERT_2_G | Number of OMIT Records in Embedded .res File ... | 11 Note   |
| PLAT941_ALERT_3_G | Average HKL Measurement Multiplicity .....       | 2.1 Low   |

- 0 **ALERT level A** = Most likely a serious problem - resolve or explain  
1 **ALERT level B** = A potentially serious problem, consider carefully  
5 **ALERT level C** = Check. Ensure it is not caused by an omission or oversight  
21 **ALERT level G** = General information/check it is not something unexpected

- 3 ALERT type 1 CIF construction/syntax error, inconsistent or missing data  
8 ALERT type 2 Indicator that the structure model may be wrong or deficient  
5 ALERT type 3 Indicator that the structure quality may be low  
10 ALERT type 4 Improvement, methodology, query or suggestion  
1 ALERT type 5 Informative message, check

## checkCIF publication errors

#### Alert level A

|                   |                                                                                                                                                     |
|-------------------|-----------------------------------------------------------------------------------------------------------------------------------------------------|
| PUBL004_ALERT_1_A | The contact author's name and address are missing,<br>_publ_contact_author_name and _publ_contact_author_address.                                   |
| PUBL005_ALERT_1_A | _publ_contact_author_email, _publ_contact_author_fax and<br>_publ_contact_author_phone are all missing.<br>At least one of these should be present. |
| PUBL006_ALERT_1_A | _publ_requested_journal is missing<br>e.g. 'Acta Crystallographica Section C'                                                                       |
| PUBL008_ALERT_1_A | _publ_section_title is missing. Title of paper.                                                                                                     |
| PUBL009_ALERT_1_A | _publ_author_name is missing. List of author(s) name(s).                                                                                            |
| PUBL010_ALERT_1_A | _publ_author_address is missing. Author(s) address(es).                                                                                             |
| PUBL012_ALERT_1_A | _publ_section_abstract is missing.<br>Abstract of paper in English.                                                                                 |

#### Alert level G

|                   |                                                           |
|-------------------|-----------------------------------------------------------|
| PUBL017_ALERT_1_G | The _publ_section_references section is missing or empty. |
|-------------------|-----------------------------------------------------------|

- 7 **ALERT level A** = Data missing that is essential or data in wrong format  
1 **ALERT level G** = General alerts. Data that may be required is missing

### Publication of your CIF

You should attempt to resolve as many as possible of the alerts in all categories. Often the minor alerts point to easily fixed oversights, errors and omissions in your CIF or refinement strategy, so attention to these fine details can be worthwhile. In order to resolve some of the more serious problems it may be necessary to carry out additional measurements or structure refinements. However, the nature of your study may justify the reported deviations from journal submission requirements and the more serious of these should be commented upon in the discussion or experimental section of a paper or in the "special\_details" fields of the CIF. *checkCIF* was carefully designed to identify outliers and unusual parameters, but every test has its limitations and alerts that are not important in a particular case may appear. Conversely, the absence of alerts does not guarantee there are no aspects of the results needing attention. It is up to the individual to critically assess their own results and, if necessary, seek expert advice.

If level A alerts remain, which you believe to be justified deviations, and you intend to submit this CIF for publication in a journal, you should additionally insert an explanation in your CIF using the Validation Reply Form (VRF) below. This will allow your explanation to be considered as part of the review process.

### Validation response form

Please find below a validation response form (VRF) that can be filled in and pasted into your CIF.

```
# start Validation Reply Form
_vrf_PUBL004_GLOBAL
;
PROBLEM: The contact author's name and address are missing,
RESPONSE: ...
;
_vrf_PUBL005_GLOBAL
;
PROBLEM: _publ_contact_author_email, _publ_contact_author_fax and
RESPONSE: ...
;
_vrf_PUBL006_GLOBAL
;
PROBLEM: _publ_requested_journal is missing
RESPONSE: ...
;
_vrf_PUBL008_GLOBAL
;
PROBLEM: _publ_section_title is missing. Title of paper.
RESPONSE: ...
;
_vrf_PUBL009_GLOBAL
;
PROBLEM: _publ_author_name is missing. List of author(s) name(s).
RESPONSE: ...
;
_vrf_PUBL010_GLOBAL
;
PROBLEM: _publ_author_address is missing. Author(s) address(es).
RESPONSE: ...
;
_vrf_PUBL012_GLOBAL
;
PROBLEM: _publ_section_abstract is missing.
RESPONSE: ...
;
# end Validation Reply Form
```

If you wish to submit your CIF for publication in Acta Crystallographica Section C or E, you should upload your CIF via [the web](#). If you wish to submit your CIF for publication in IUCrData you should upload your CIF via [the web](#). If your CIF is to form part of a submission to another IUCr journal, you will be asked, either during electronic [submission](#) or by the Co-editor handling your paper, to upload your CIF via our web site.

---

**PLATON version of 16/07/2020; check.def file version of 12/07/2020**

**Datablock I - ellipsoid plot**

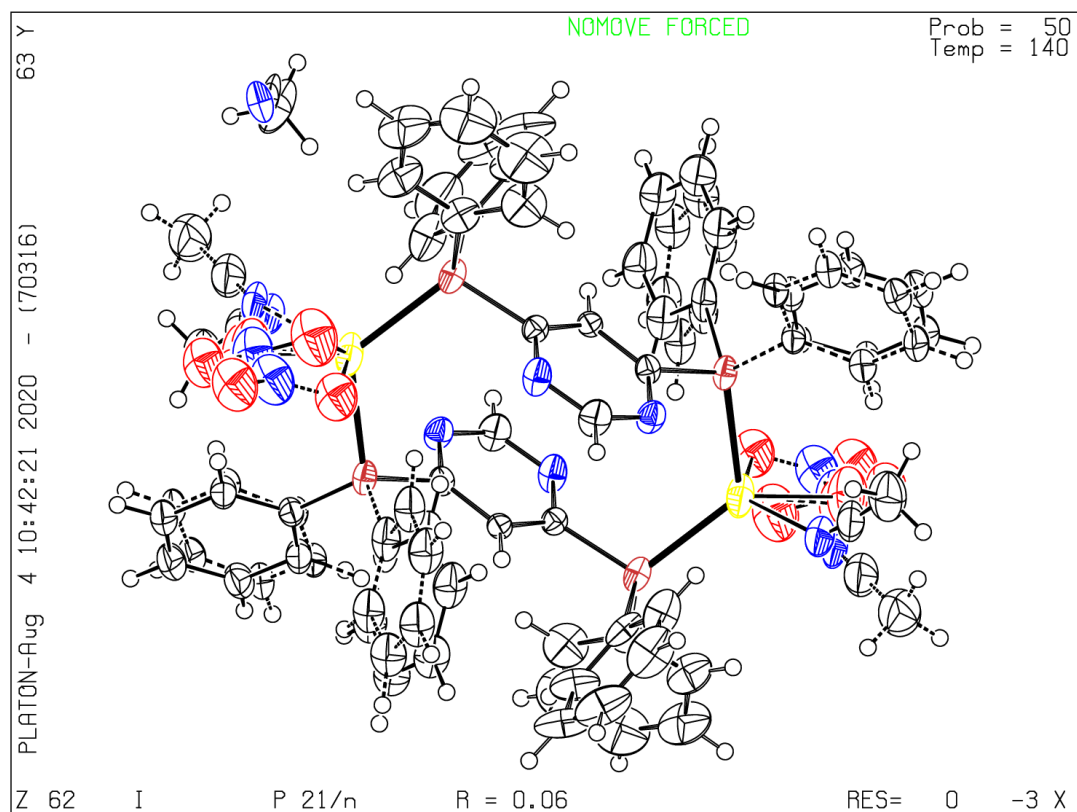

[Download CIF editor \(publCIF\) from the IUCr](#)  
[Download CIF editor \(enCIFer\) from the CCDC](#)  
[Test a new CIF entry](#)
